# Supplementary material
Source: PubMed Central journal article supplement (PMC4227816)
Supplement: ja502754f_si_001.pdf [file ja502754f_si_001.pdf]

## Supplementary Information

Identification of Biologically Active, HIV TAR RNA-Binding Small Molecules Using Small Molecule Microarrays

Joanna Sztuba-Solinska,<sup>†¶</sup> Shilpa R. Shenoy,<sup>‡¶¶</sup> Peter Gareiss,<sup>§</sup> Lauren H. Krumpe,<sup>‡¶¶</sup> Stuart F.J. Le Grice,<sup>†</sup> Barry R. O'Keefe,<sup>‡</sup> and John S. Schneckloth, Jr.<sup>#\*</sup>

<sup>†</sup>HIV Drug Resistance Program, National Cancer Institute, Frederick, MD, USA,

<sup>‡</sup>Molecular Targets Laboratory, National Cancer Institute, Frederick, MD, USA

<sup>¶¶</sup>Leidos Biomedical Research, Inc., Frederick National Laboratory, Frederick, MD, USA

<sup>§</sup>Center For Molecular Discovery, Yale University, New Haven CT, USA

<sup>#</sup>Chemical Biology Laboratory, National Cancer Institute, Frederick, MD, USA

\*e-mail: schnecklothjs@mail.nih.gov

### General Information:

Nucleic acids were purchased from Dharmacon (ThermoFisher), with the following sequences:

TAR RNA: 5'-GGCAGAUCUGAGCCUGGGAGCUCUCUGCC-3'

Cy5-labeled TAR RNA: 5'-Cy5-GCAGAUCUGAGCCUGGGAGCUCUCUGCC-3'

2-AP-labeled TAR RNA: 5'-GGCAGAUC(2AP)GAGCCUGGGAGCUCUCUGCC-3'

Cy5-labeled miR-21 RNA: 5'-Cy5-GGGUUGACUGUUGAAUCUCAUGGCAACCC-3'

Small molecules were purchased from commercial vendors, assessed for purity with LC/MS analysis and <sup>1</sup>H NMR, dissolved in DMSO at a concentration of 10 mM, and used without further purification. See Figure SI-4 for compound supplier/product ID information.

**Figure SI-1:** Reversibility of TAR RNA hairpin folding by differential scanning calorimetry.

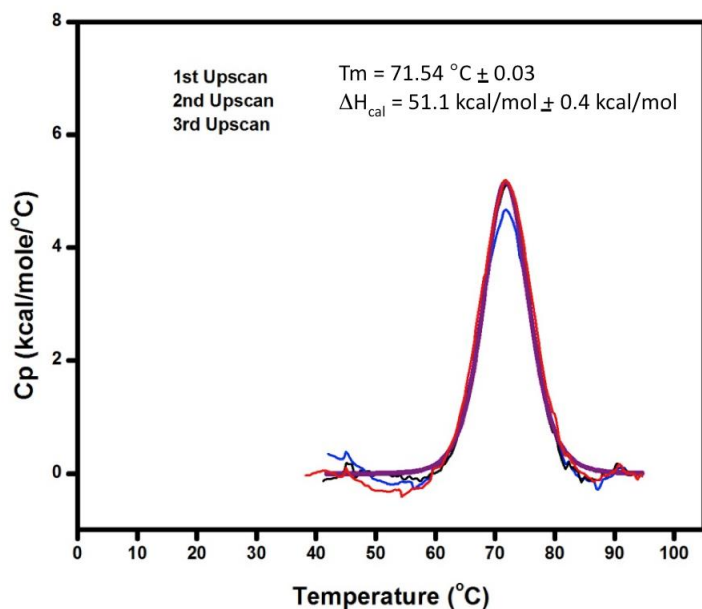

**Differential Scanning Calorimetry (DSC)** – DSC experiments were carried out on a Microcal VP-DSC microcalorimeter (GE Healthcare, originally Microcal, Northampton, MA). Prior to running the experiments, all surfaces were treated with RNase Zap Wipes (Ambion®) to minimize RNase contamination. The calorimeter, syringes, degassing tubes and stir bars were cleaned with 70% ethanol, followed by DEPC treated water (Ambion®). A 50  $\mu\text{M}$  solution of TAR RNA in PBS pH 7.4 was heated to 95  $^\circ\text{C}$  in a hot water bath for 5 minutes and was allowed to cool to room temperature (over a 2 hour period). Annealed RNA was frozen in 1 mL aliquots at -20  $^\circ\text{C}$ . Per routine protocol, buffer (1X PBS, pH 7.4) was introduced to both the reference and sample cells and the calorimeter was allowed to ramp through one heat-cool cycle (10  $^\circ\text{C}$  to 95  $^\circ\text{C}$ ) at a rate of 60  $^\circ\text{C/hr}$ . During the down scan at 25 $^\circ\text{C}$ , the buffer solution from the sample cell was quickly replaced with a degassed solution of 50  $\mu\text{M}$  TAR RNA. The entire system was re-pressurized to approximately 30 psi of positive pressure to prevent evaporation at higher temperatures, and the experiment was allowed to continue. A total of 8 alternating up-down scans (10  $^\circ\text{C}$  to 95  $^\circ\text{C}$ ) was performed to measure reversibility of folding/unfolding of the RNA. According to Origin DSC Analysis software, buffer effects were corrected and integration of the unfolding transition was performed. Thermograms were fitted to a two-state melting model and the calorimetric transition enthalpy ( $\Delta H_{\text{unf}}$ ) was obtained from the area under the excess heat capacity peak, the midpoint of the transition calculated as the melting temperature ( $T_m$ ).

#### **Minus strand strong stop assay performed in the presence of 4**

RNA-dependent DNA polymerase activity was determined on a viral RNA corresponding to nt 1–365 of the HIV-1 NL4-3 (+) strand genome. A fluorescently labeled DNA primer (5'-Cy5 GTC CCT GTT CGG GCG CCA-3') was combined with template RNA at a ratio of 1:1.2 in 10 mM Tris/HCl, pH 7.6, 25 mM KCl and heated in a thermal cycler at 85 °C for 3 min and then cooled to 4 °C at 0.2 °C/s. **4** was added at final concentrations of 0, 1, 5, 10 μM and incubated for 10 min at room temperature. DNA polymerase reactions were performed at 37 °C and contained 10 mM Tris/HCl, pH 7.8, 50 mM MgCl<sub>2</sub>, 80 mM KCl, 1 mM DTT, 0.2 mM dNTPs, 25 nM template/ primer, and 12.5 nM RT. Aliquots were removed at 0, 5, and 20 min time points and combined with an equal volume of 8 M urea in 1x Tris/borate/EDTA. Before loading, samples were heated to 95 °C for 3 min and immediately placed on ice. Nucleic acids were fractionated by denaturing 8% polyacrylamide gel electrophoresis. Gels were scanned with a GE Health-care Typhoon Trio + and analyzed with Image Quant Total Lab software.

**Figure SI-2.**

[A]

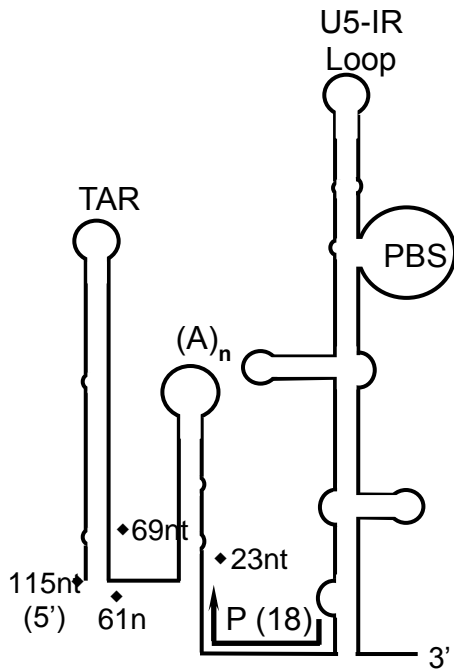

[B]

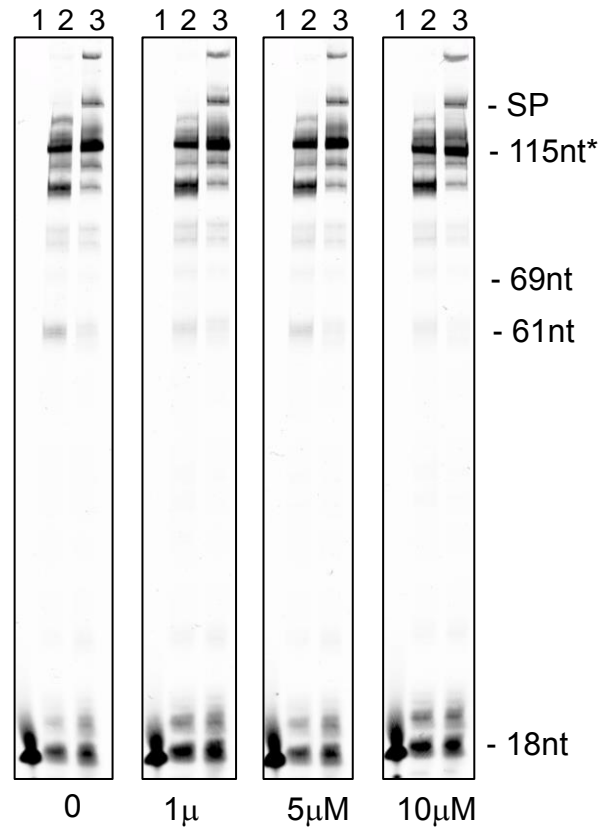

[4]

**Figure SI-2.** Minus strand strong stop assay performed in the presence of **4**.

A schematic representation of the HIV-1 genomic RNA substrate is presented in panel [A]. PBS, primer binding site; Poly(A), poly(A) hairpin; TAR, transactivation hairpin. The position to which the synthetic primer was hybridized is indicated via arrow. In the RNA-dependent DNA synthesis assay of panel [B], the asterisk indicates the expected DNA synthesis product (~115 nt), and SP reflects the results of a self-priming event. Lanes 1, 2 and 3 represent 0, 5 and 20 min time points, respectively, performed in the presence of **4** compound at different final concentrations: 0, 1, 5, 10  $\mu$ M.

**Figure SI-3.**

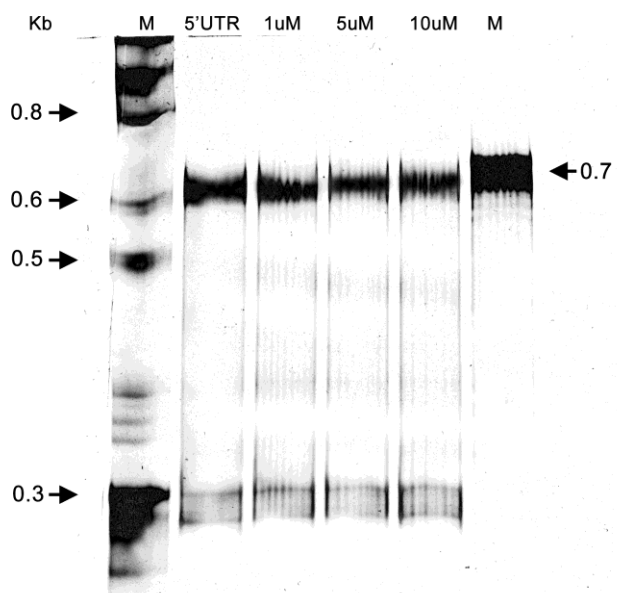

**Figure SI-3.** Verification of homogenous conformation of the HIV-1 RNA 5' UTR region. Increasing concentrations of the compound **4** (indicated on top) incubated with HIV-1 RNA 5' UTR region were added prior the non-denaturing polyacrylamide gel electrophoresis. The leftmost lane provides molecular weight markers.

**Figure SI-4.** Cell-based Anti-HIV activity of **1**, **4**, and related compounds. Compounds were purchased from commercial vendors, analyzed for purity by LC/MS, and used without further purification. For each compound, vendor name (below, in parenthesis) and product ID are indicated. Assays were performed as described in the main text.

| Compound                           | EC <sub>50</sub> (μM) | CC <sub>50</sub> (μM) | Comments        |
|------------------------------------|-----------------------|-----------------------|-----------------|
| ST4133609 (Compound <b>4</b> )     | 28                    | ND                    |                 |
| 4478-7480 (Compound <b>1</b> )     | 123                   | ND                    |                 |
| ST50055849                         | > 100                 | ND                    |                 |
| AKOS001656555 (Compound <b>2</b> ) | > 10                  | 9                     |                 |
| 5251219                            | > 20                  | 40                    |                 |
| 4340-1594 (Compound <b>3</b> )     | > 30                  | ND                    |                 |
| 9233834                            | > 63                  | ND                    |                 |
| 5277323                            | > 63                  | ND                    |                 |
| 7878578                            | > 63                  | ND                    |                 |
| 7928037                            | > 63                  | ND                    |                 |
| 7852383                            | > 63                  | ND                    |                 |
| 7911696                            | > 63                  | ND                    |                 |
| <b>Acepromazine maleate</b>        | > 16                  | 18                    |                 |
| ST4119563                          | > 330                 | 190                   |                 |
| ST4133739                          | > 316                 | ND                    |                 |
| 7746407                            | > 3                   | ND                    | Abnormal curves |
| ST014353 (Compound <b>5</b> )      | ND                    | ND                    | Abnormal curves |

ND = Not Determined.

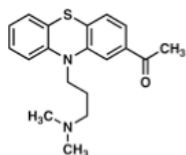

Acepromazine maleate

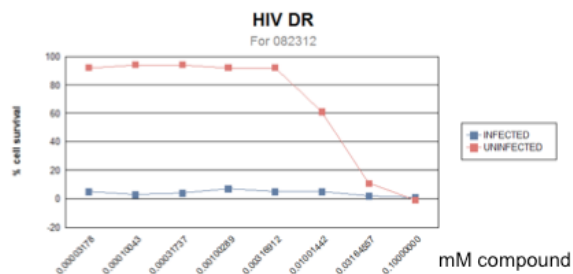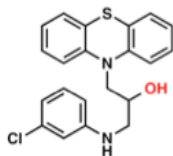

AKOS001656555 (AKos)

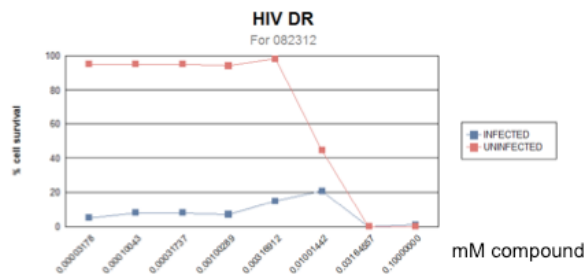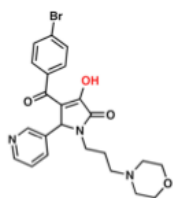

4340-1594 (ChemDiv)

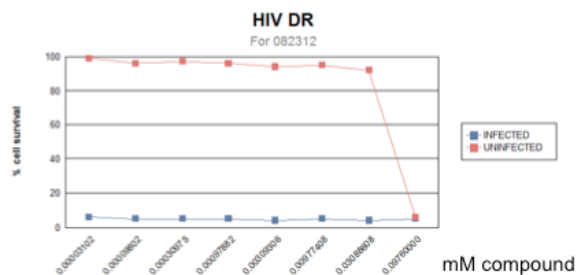

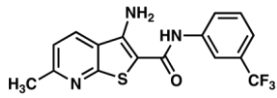

ST4133609  
(TimTec)

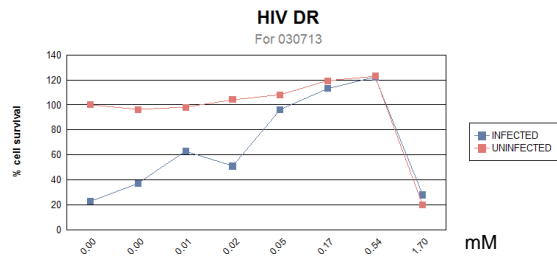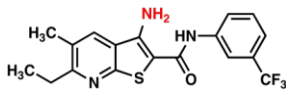

4478-7480  
(ChemDiv)

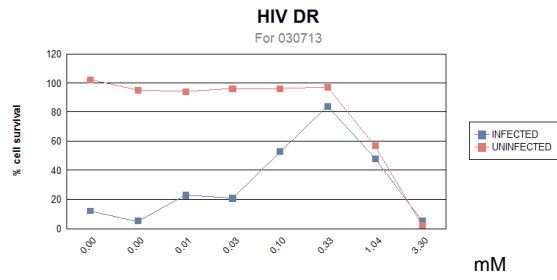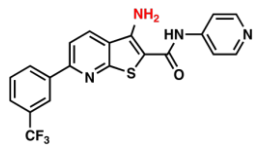

ST014353  
(TimTec)

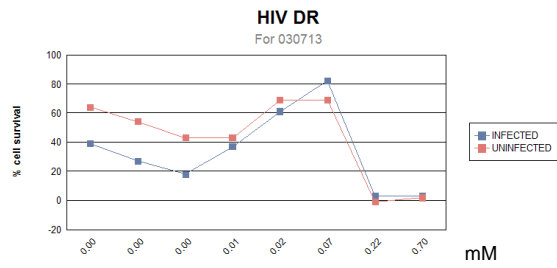



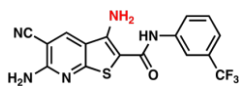

9233834  
(ChemBridge)

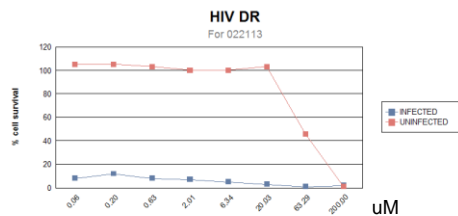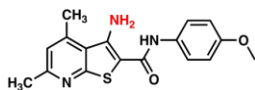

5277323  
(ChemBridge)

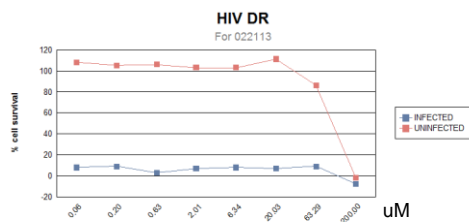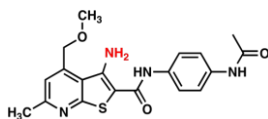

7878578  
(ChemBridge)

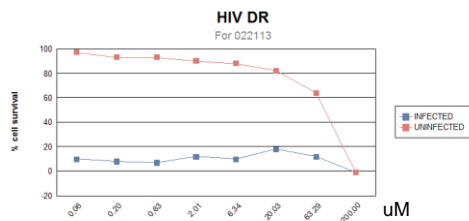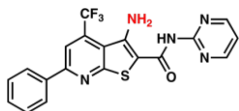

7928037  
(ChemBridge)

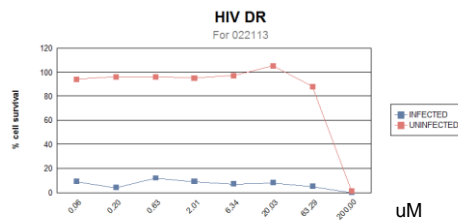

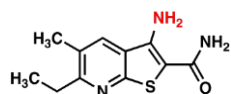

5251219  
(ChemBridge)

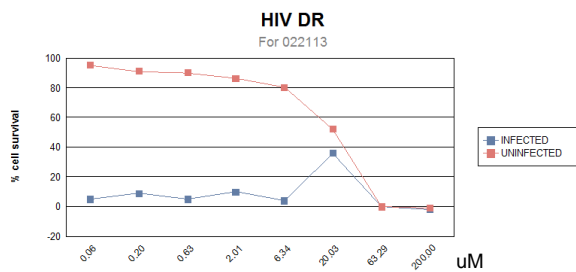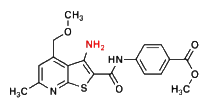

7746407  
(ChemBridge)

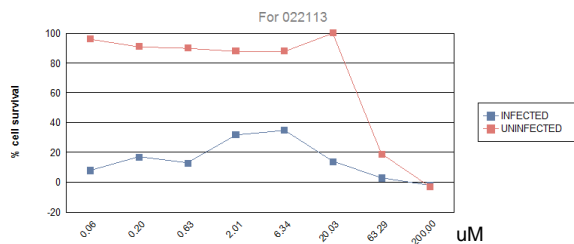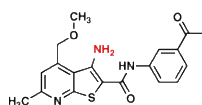

7852383  
(ChemBridge)

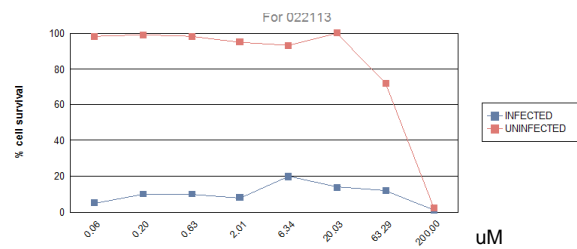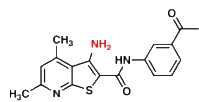

7911696  
(ChemBridge)

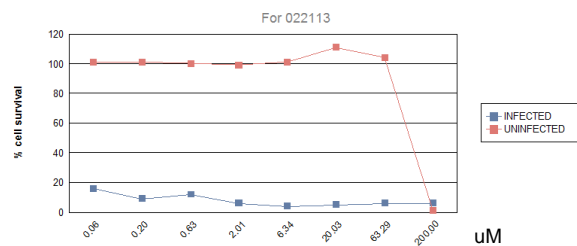

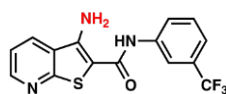

ST4133739  
(TimTec)

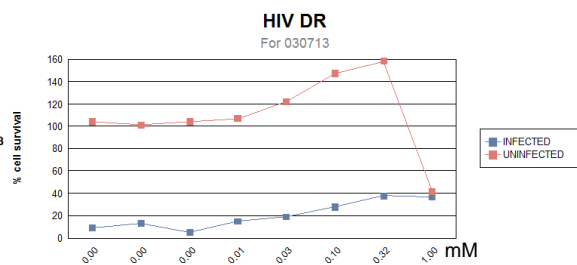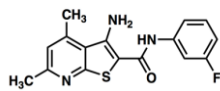

ST50055849  
(TimTec)

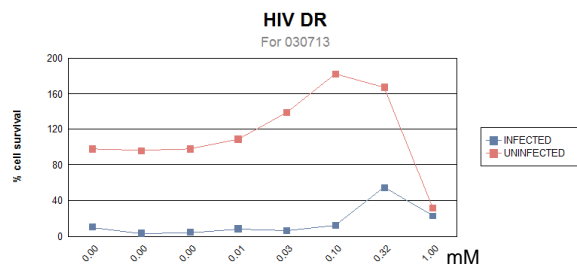

**Figure SI-5.**  $K_d$  measurement with compound **5** using a 2-aminopurine titration. The titration was carried out as described in the main text.

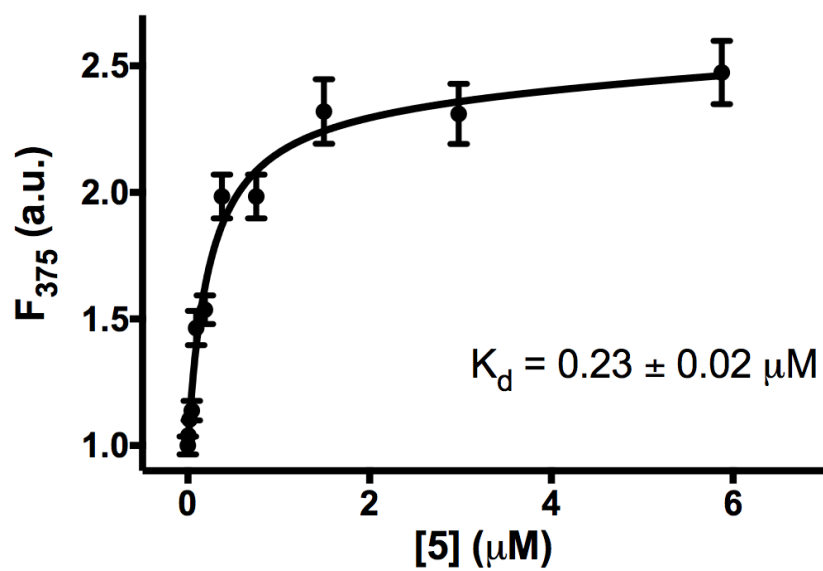

**Figure SI-6.** Docking compound **4** to multiple known TAR conformations

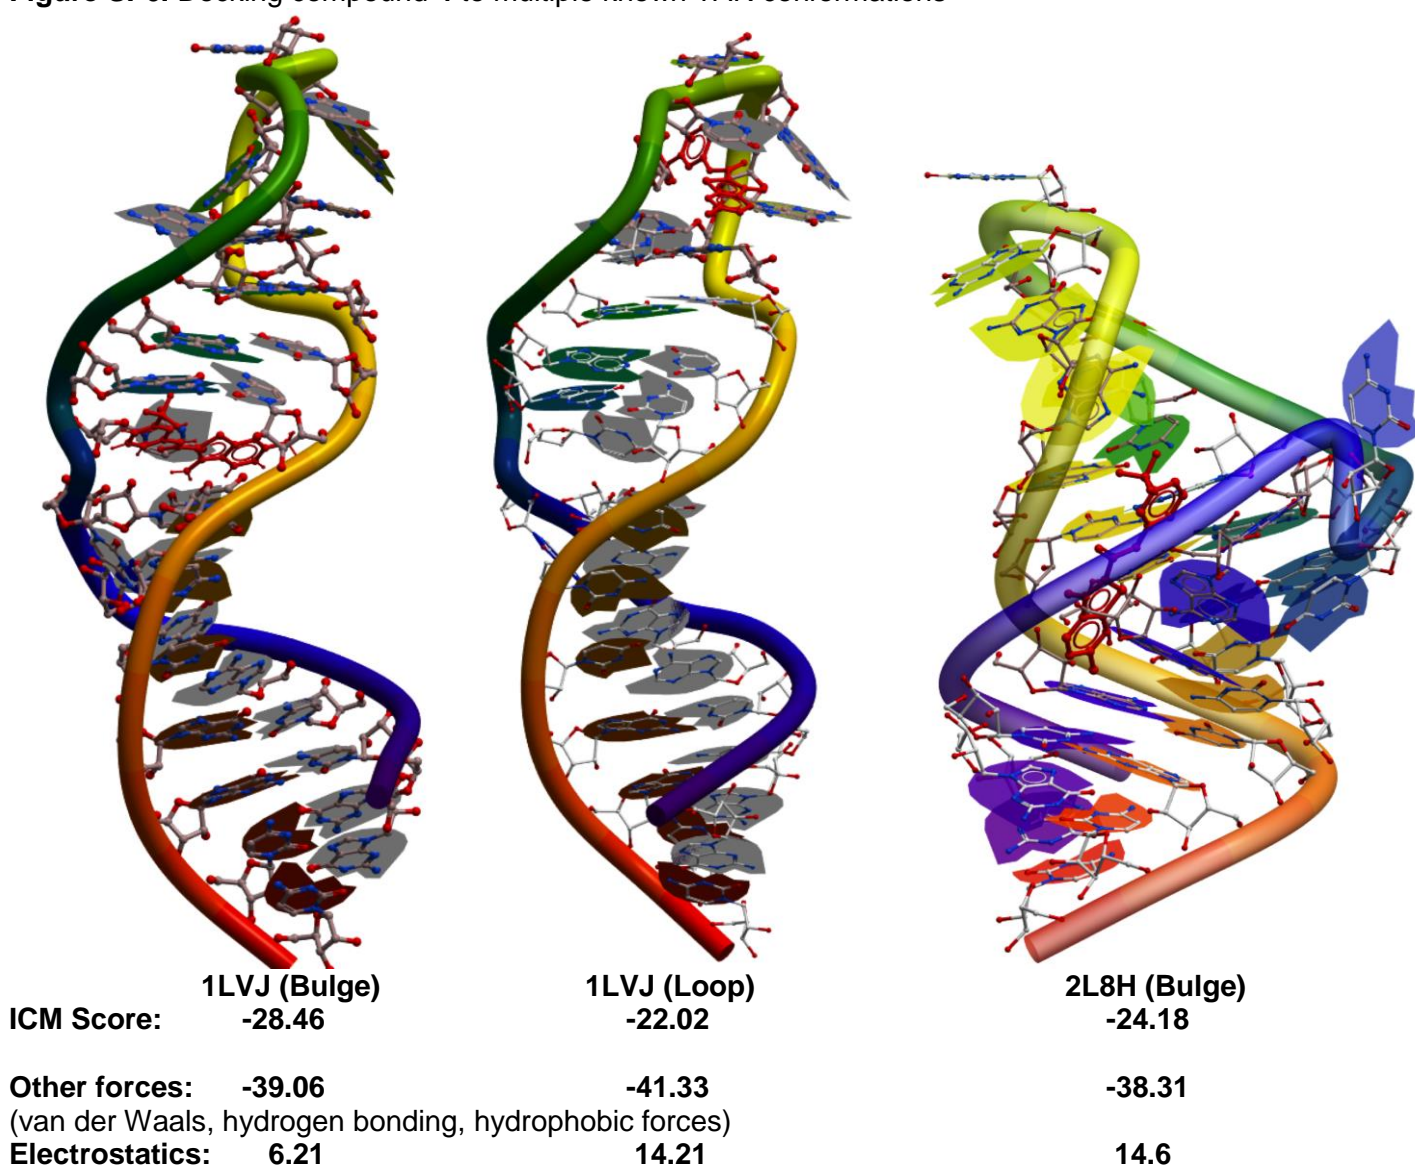

Docking studies were performed with ICM (Molsoft) using TAR structures from the PDB (listed below) and compound **4**. Binding pockets on TAR were defined both using the ICM PocketFinder module as well as by docking **4** to known small molecule binding sites. For each of the structures, compound **4** was docked both to all identified binding sites. Docking simulations were carried out at a thoroughness of 10 (the maximum number of Monte Carlo iterations). Each simulation provided ~15-20 poses, each of which was visually inspected after completion of the simulations. The three best scoring poses are illustrated above, with compound **4** drawn in red. In each case, the relative contribution of non-electrostatic forces (van der Waals, hydrophobic interactions, hydrogen bonding interactions) and electrostatics to the binding score are indicated.

#### **Structures Used in Docking Simulations:**

1LVJ (acetylpromazine-bound)  
1QD3 (neomycin-bound)  
1UTS (synthetic compound-bound)  
1UUD (synthetic compound-bound)  
1UUI (synthetic compound-bound)  
2L8H (synthetic compound-bound)
